# Supplementary material
Source: Research Square preprint supplement (doi:10.21203/rs.3.rs-8647519/v1)
Supplement: Supplementary file 1 [file 7eb1cdc124c2a3206169b162.docx]

*Supplementary Information*

**Dermal hypoxia adaptation promotes psoriasis progression by activating HIF2α-NAMPT Axis**

Jingwei Jiang1, Weiwei Liu1, Dehuan Wang1, Yi Zou1,2, Yang Xiao1, Weiyi An3, Xuegang Xu2, Yan Wu2, Xiao Xiang1, Qiaoli Xie1, Hengguang Zhao3, Li Yang1, Xinghua Gao2✉, Mingxing Lei1✉

This file includes the following subsections:

• **Extended Data Fig. 1-7**

**• Extended Data Table. 1-3**

**Extended Data Fig. 1**

**
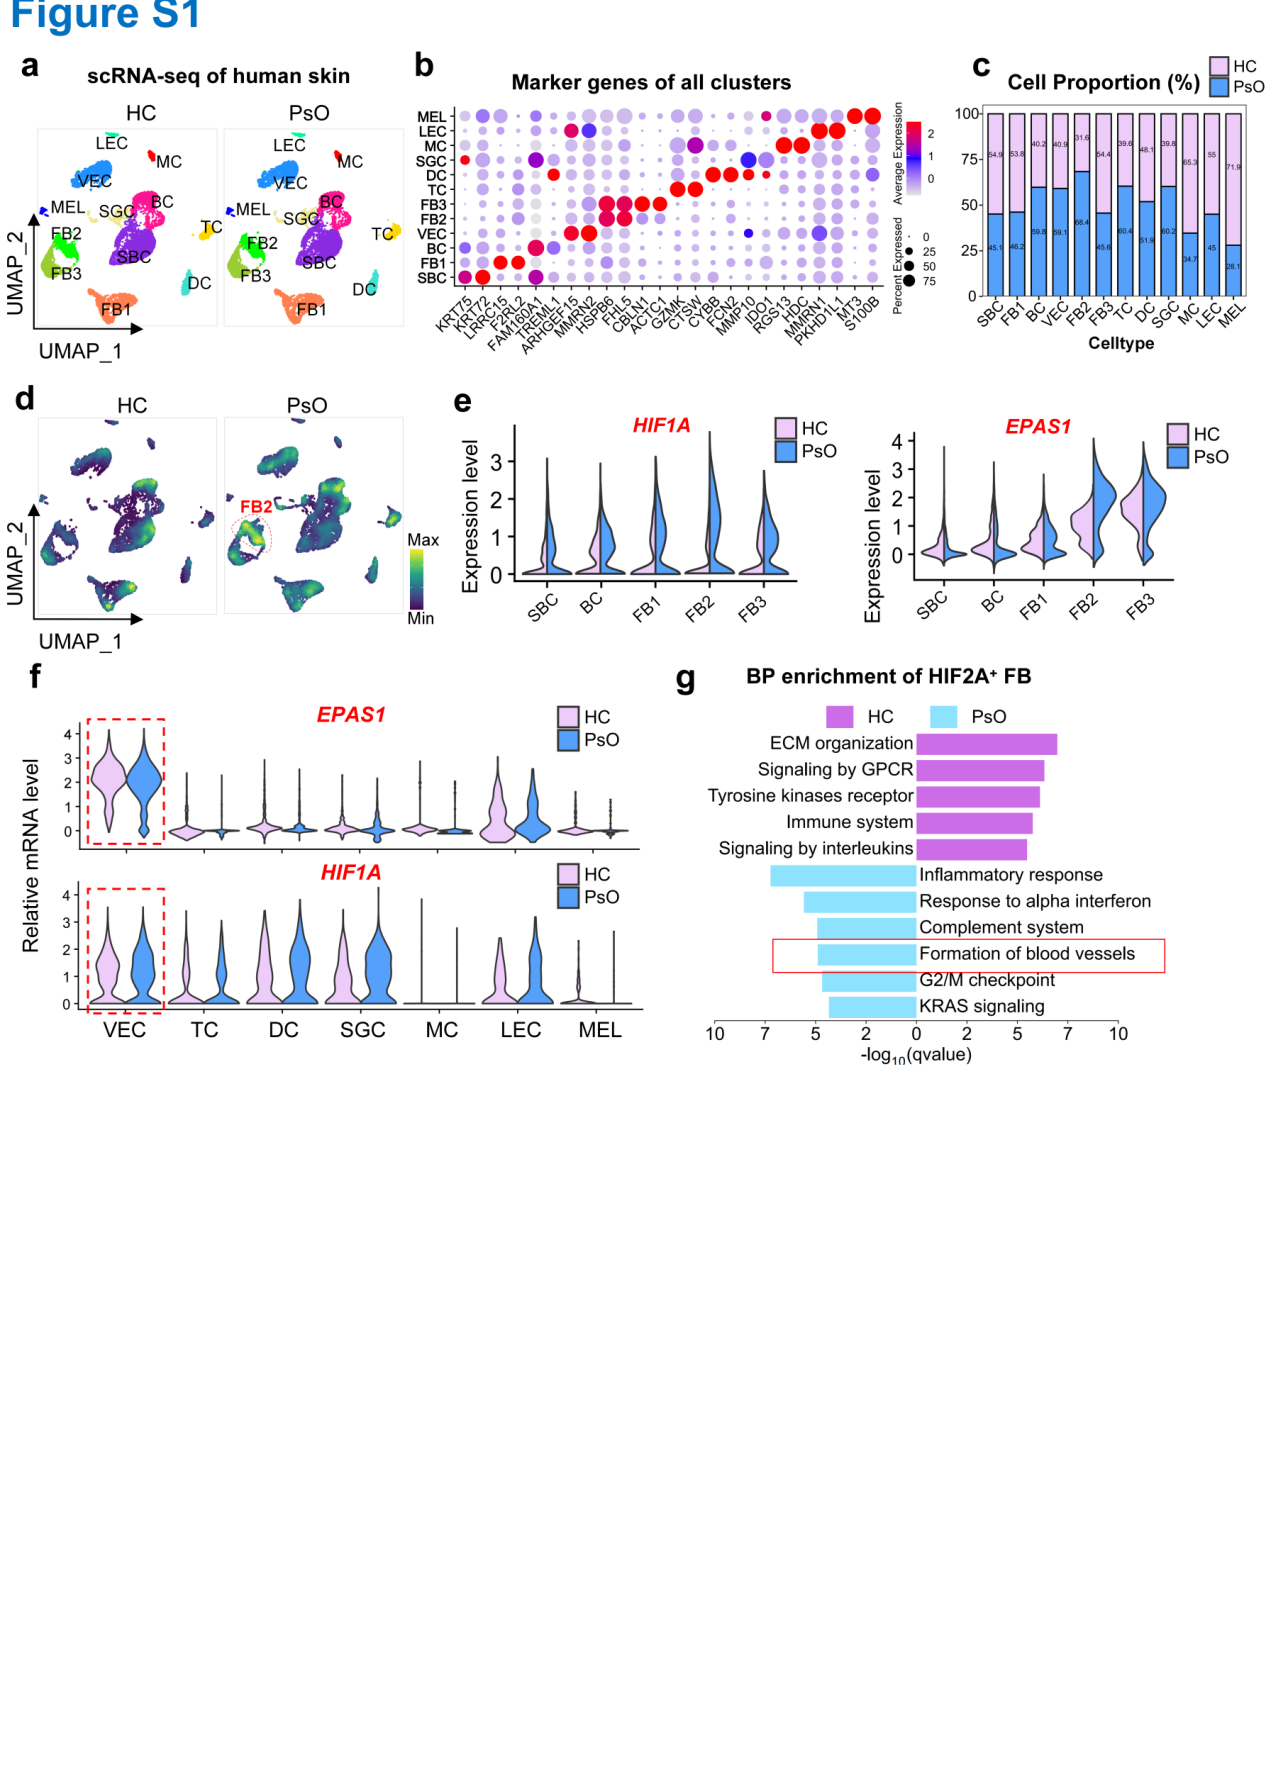
**

**Extended Data Fig. 1. Single-cell transcriptomic analysis reveals increased EPAS1 expression in fibroblasts from psoriatic skin.**

1. UMAP embedding of single cell transcriptomes from psoriatic and healthy skin (n = 3 per group). Major cell clusters are annotated: MEL, melanocytes; LEC, lymphatic endothelial cells; MC, mast cells; SGC, sweat gland cells; DC, dendritic cells; TC, T cells; FB, fibroblasts; VEC, vascular endothelial cells; BC, basal cells; SBC, suprabasal cells.
2. Bubble plot showing representative marker genes for each annotated cluster (bubble size = fraction of cells expressing marker; color = average expression).
3. Bar graph comparing relative proportions of annotated cell subpopulations between psoriatic and healthy skin.
4. Feature plots showing AUCell scores for a hypoxia-related gene signature in psoriatic versus healthy samples.
5. Violin plots of HIF1A and EPAS1 expression in fibroblast (FB) and epidermal cell (BC + SBC) clusters from psoriatic and healthy samples.
6. Violin plots of HIF1A and EPAS1 expression across VEC, TC, DC, SGC, MC, LEC and MEL clusters in psoriatic versus healthy skin.
7. Biological process (BP) enrichment analysis for HIF2A+ fibroblasts in psoriatic and healthy skin; angiogenesis related pathways are highlighted (red box).

**Extended Data Fig. 2**

**
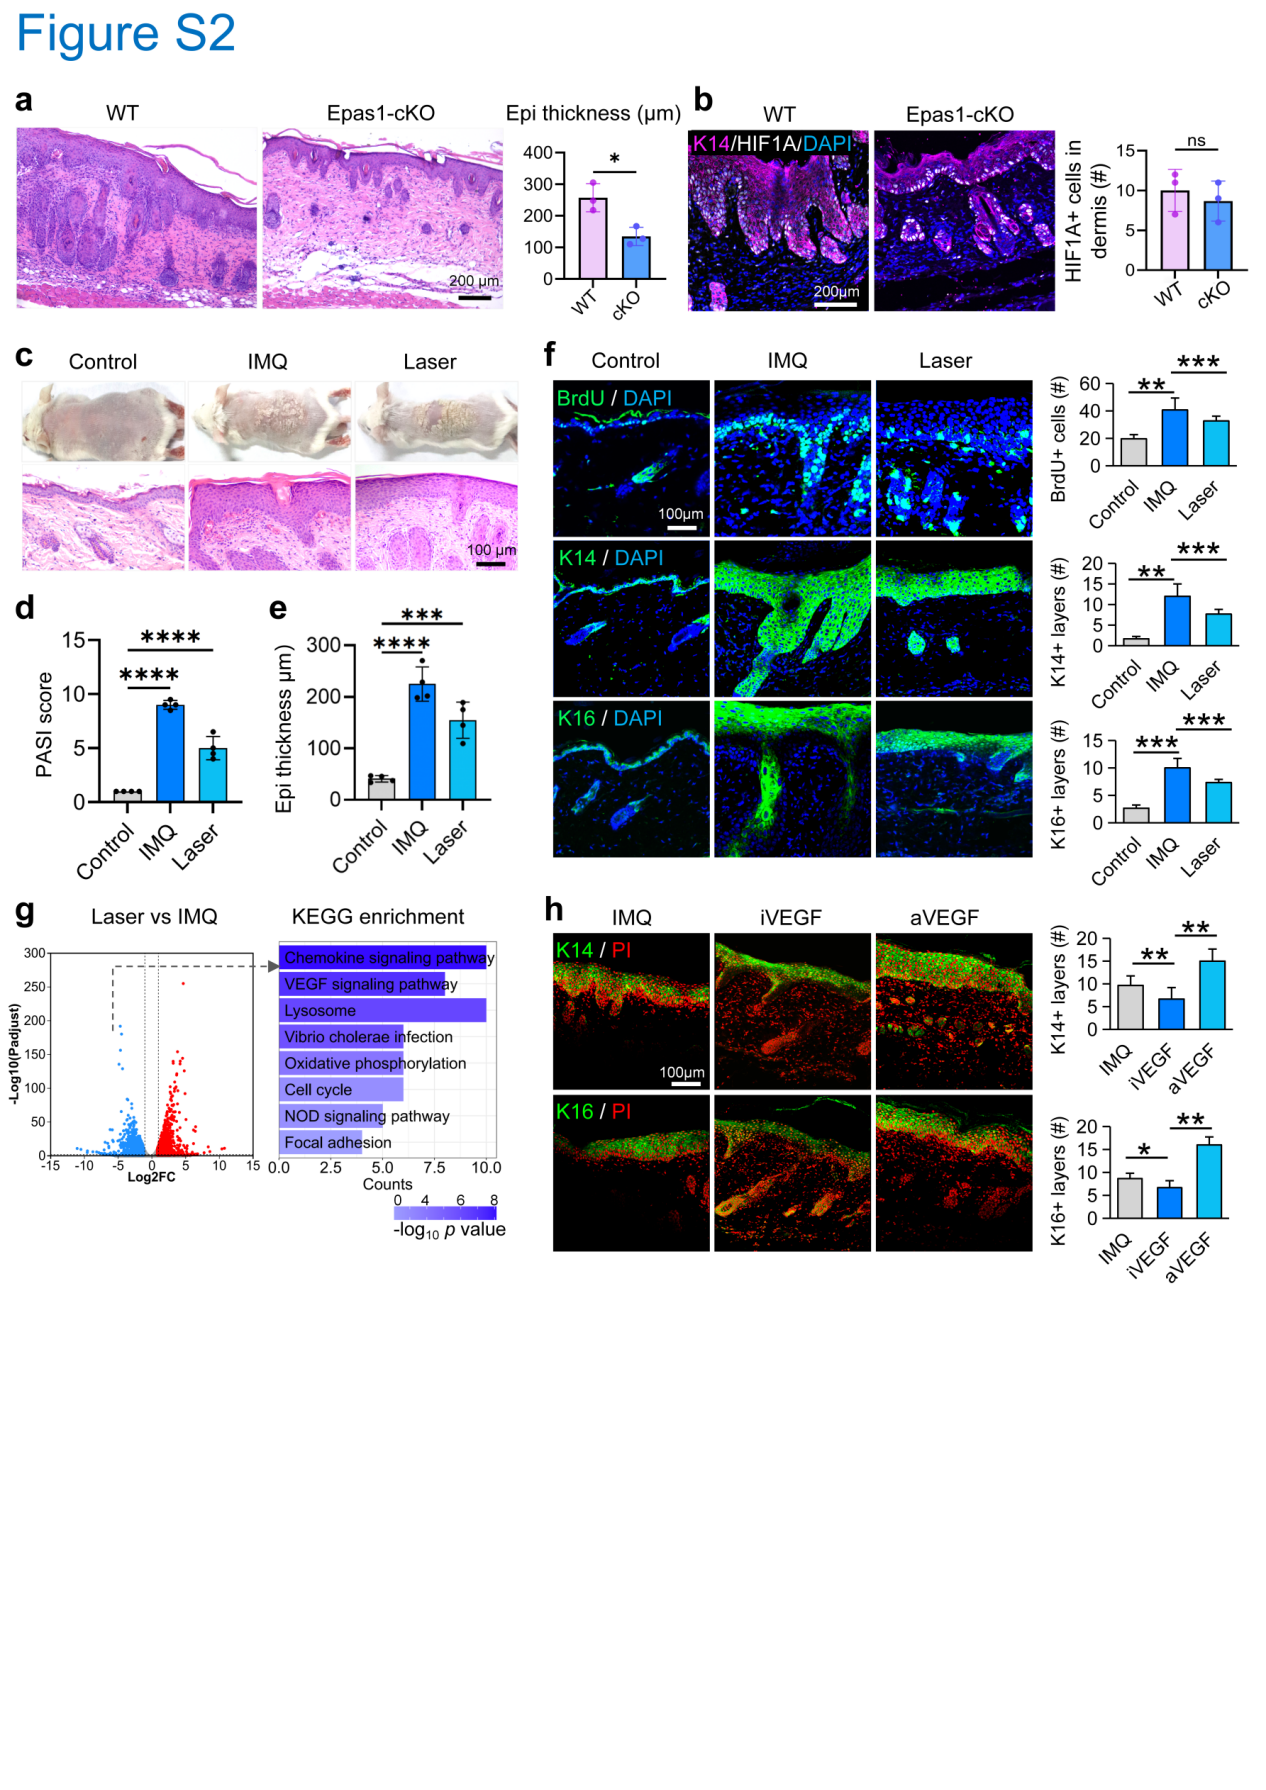
**

**Extended Data Fig. 2. Laser ablation of cutaneous vessels attenuates psoriasiform pathology in mice.**

1. Left: representative H&E staining of dorsal skin from WT and Epas1-cKO mice after topical imiquimod (IMQ) treatment. Right: quantification of dorsal skin thickness in WT and Epas1-cKO mice. *p < 0.05, n = 3.
2. Left: representative dual immunofluorescence for HIF1A and K14 in WT and Epas1-cKO skin. Right: quantification of HIF1A+ cells; n = 3. ns, not significant.
3. Top: representative photographs of dorsal skin from control, IMQ, and Laser groups. Bottom: corresponding H&E images showing altered epidermal morphology; n = 5.
4. Quantification of PASI score for control, IMQ and Laser groups. ****p < 0.0001, n = 5.
5. Quantification of epidermal thickness in control, IMQ and Laser groups. ****p < 0.0001, n = 5.
6. Left: representative immunofluorescence for BrdU, K14 and K16 in control, IMQ and Laser groups. Right: quantification of BrdU+ cells, K14+ layers and K16+ layers. n = 3; **p < 0.01, ***p < 0.001.
7. Left: volcano plot showing differential gene expression between Laser and IMQ groups. Right: pathway enrichment analysis of genes downregulated in the Laser group.
8. Left: representative immunofluorescence for K14 and K16 in IMQ, VEGFR inhibited (iVEGF) and VEGFR activated (aVEGF) groups. Right: quantification of K14+ and K16+ layers; n = 3. *p < 0.05, **p < 0.01.

**Extended Data Fig. 3**

**
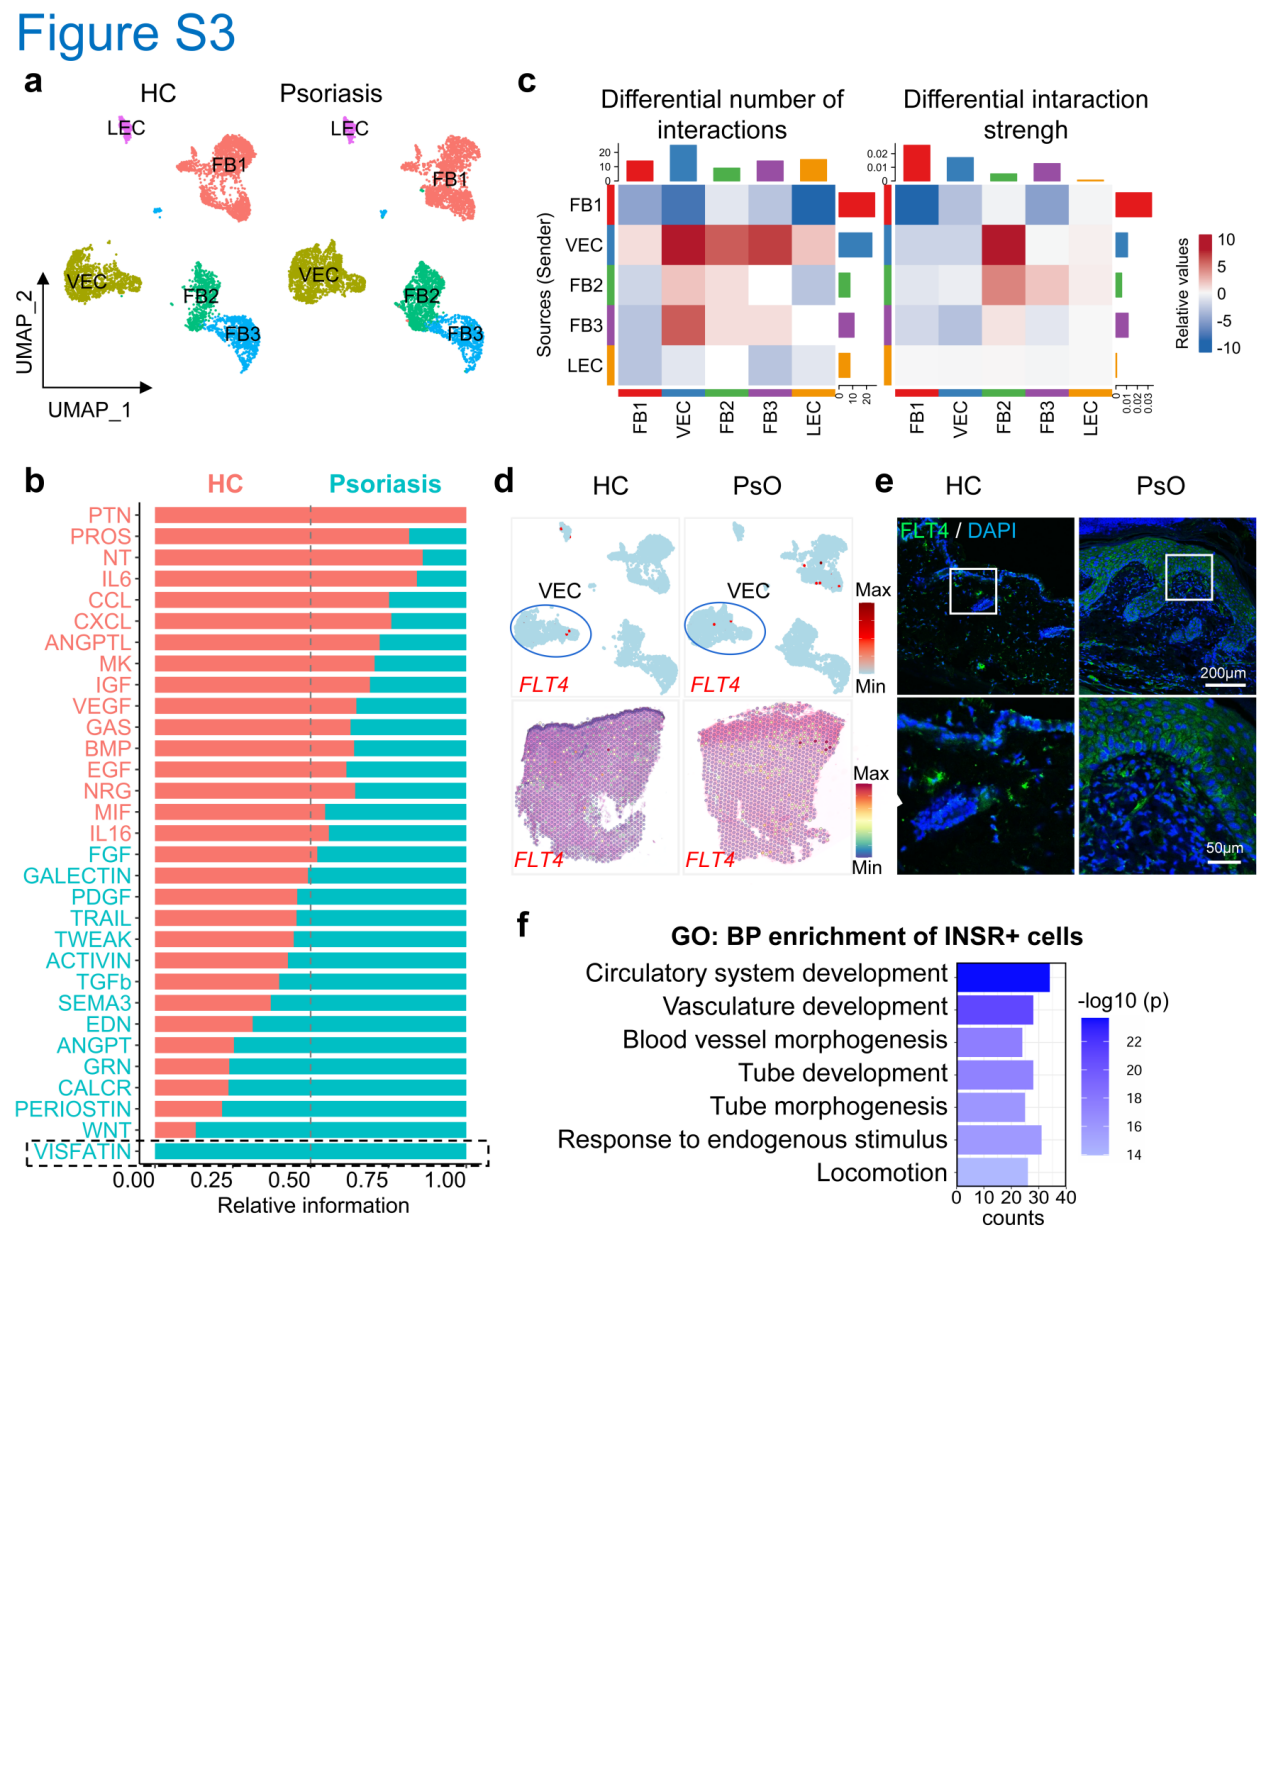
**

**Extended Data Fig. 3. Enhanced HBEGF–INSR signaling between fibroblasts and vascular endothelial cells in psoriatic skin.**

1. UMAP embedding of fibroblast (FB) and vascular endothelial cell (VEC) clusters from scRNA-seq of human psoriatic and healthy skin, showing cluster composition and group specific changes.
2. CellChat intercellular communication analysis comparing signaling pathways between FB and VEC in healthy control (HC) and psoriasis groups.
3. Heatmaps summarizing differences in FB–VEC interactions: number of interactions (left) and interaction strength (right).
4. Top: scRNA-seq feature plots showing FLT4 expression in psoriasis and healthy samples. Bottom: spatial transcriptomics plots showing the spatial distribution of FLT1 in psoriatic versus healthy skin.
5. Representative immunofluorescence images of FLT4 expression in control and IMQ induced psoriasiform mouse skin, with accompanying quantification (n = 3).
6. GO biological process terms enriched among genes specifically upregulated in INSR + vascular endothelial cells, highlighting signaling pathways potentially involved in angiogenesis.

**Extended Data Fig. 4**

**
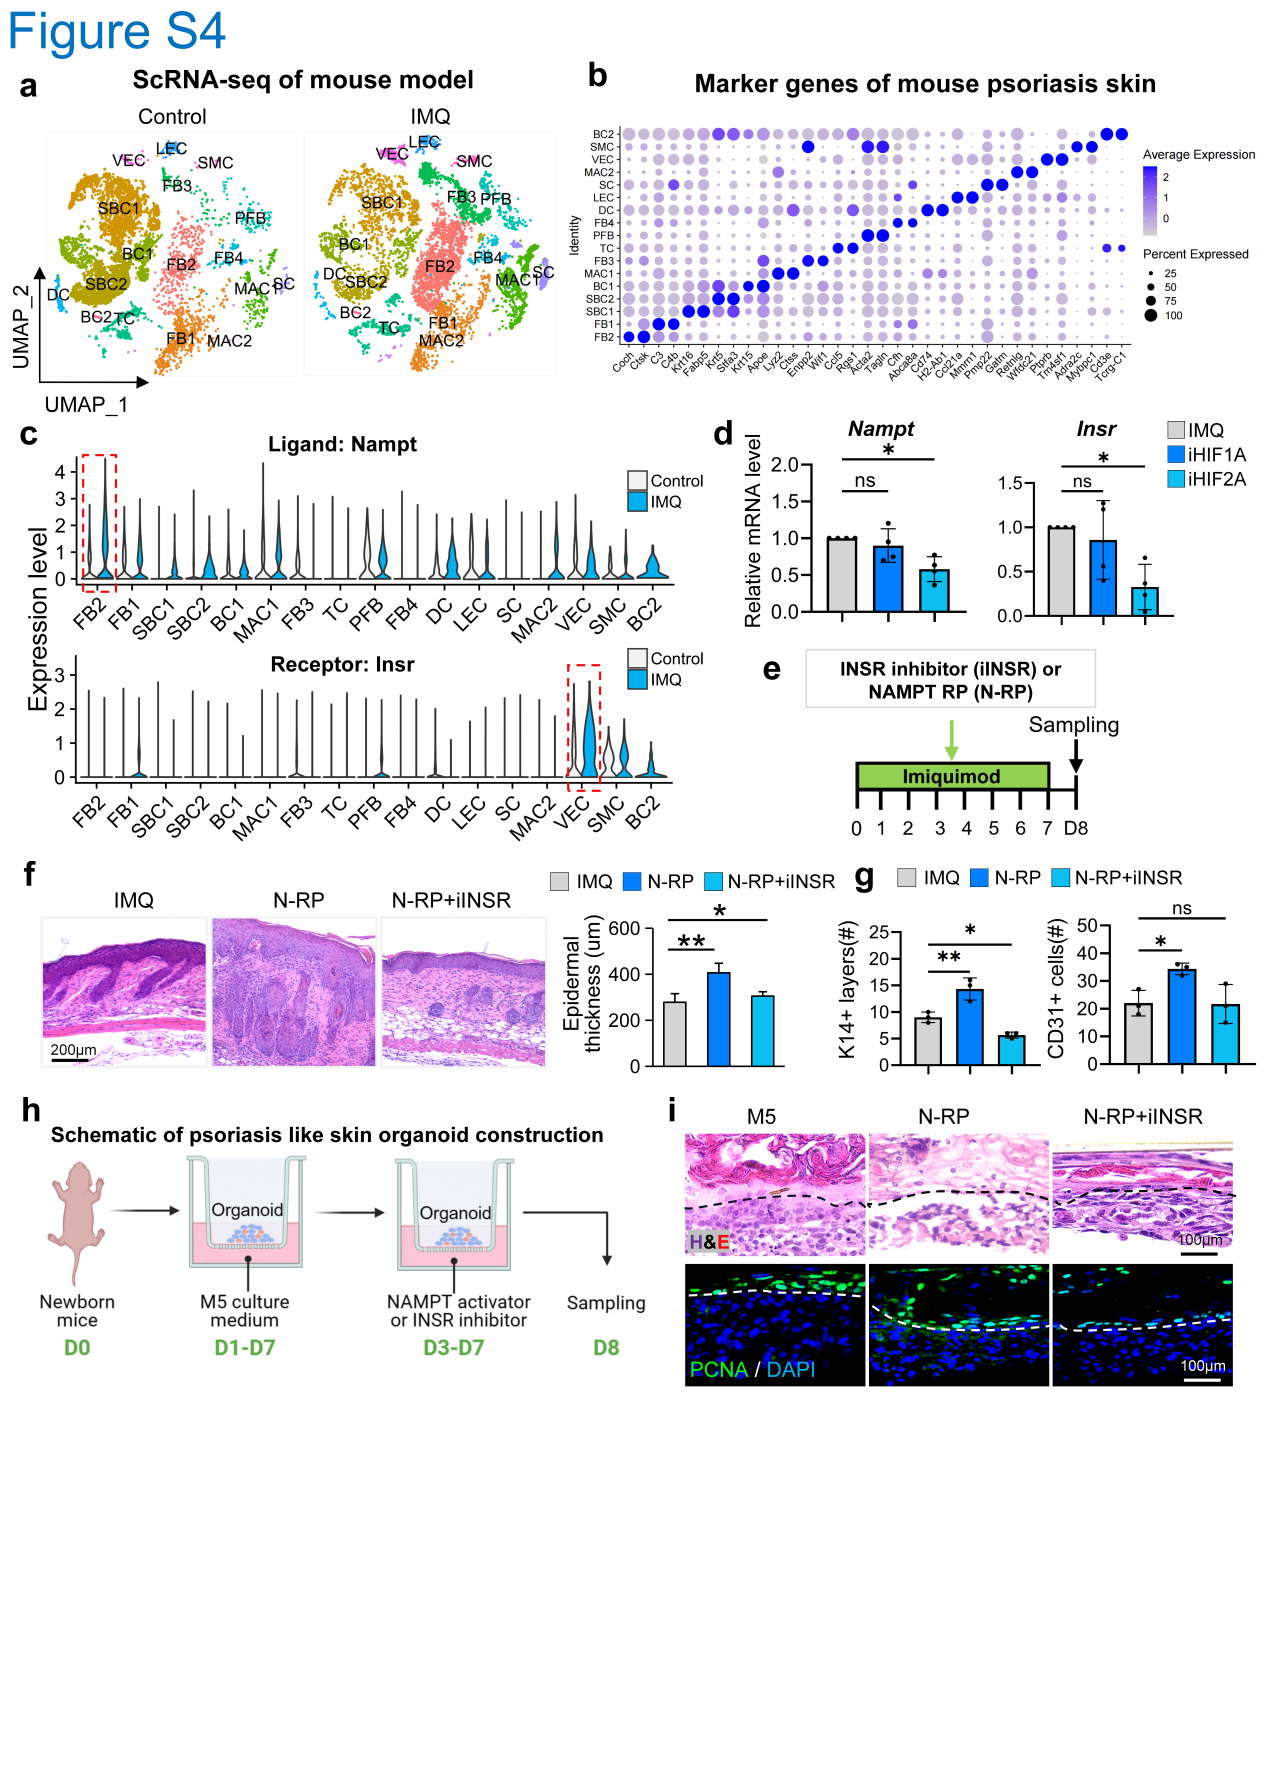
**

**Extended Data Fig. 4 Inhibition of the NAMPT–INSR axis attenuates psoriasiform phenotypes in mouse models and skin organoids.**

1. UMAP embedding of single-cell transcriptomes from imiquimod (IMQ)-treated psoriasiform mice and control mice, showing major epidermal and stromal cell clusters. Abbreviations: BC, basal cells; SMC, smooth muscle cells; VEC, vascular endothelial cells; MAC, macrophages; SC, Schwann cells; LEC, lymphatic endothelial cells; DC, dendritic cells; FB, fibroblasts; PFB, proliferative fibroblasts; TC, T cells; SBC, suprabasal cells.
2. Bubble plot displaying representative marker genes for each annotated cluster
3. Violin plots showing expression changes of NAMPT (upper panel) and INSR (lower panel) across annotated cell populations in control versus IMQ-treated groups.
4. RT-qPCR quantification of Nampt and Insr expression following inhibition of HIF1A or HIF2A; n = 4. *p < 0.05; ns, not significant.
5. Schematic of the experimental design for NAMPT–INSR pathway perturbation in vivo. Dorsal skin was treated daily with IMQ for 7 days, and samples were collected on day 8. Groups: IMQ, IMQ treatment only; N-RP, IMQ + recombinant NAMPT protein; N-RP + iINSR, IMQ + recombinant NAMPT protein + INSR inhibitor.
6. Left: Representative H&E-stained images of dorsal skin from IMQ-treated, N-RP (recombinant NAMPT)-treated, and N-RP-iINSR (recombinant NAMPT + INSR inhibitor)-treated groups. Right: Quantification of epidermal thickness; n = 3 biologically independent samples. *p < 0.05, **p < 0.01.
7. Quantification of K14 layer number (left) and CD31 vessel counts (right) in IMQ-treated, N-RP-treated, and N-RP-iINSR-treated groups; n = 3 biologically independent samples. *p < 0.05, **p < 0.01; ns, not significant.
8. Workflow schematic for constructing psoriasis-like skin organoids. On day 0 (D0), neonatal mouse skin was collected, and dermal and epidermal cells were isolated and co-cultured for self-organize in M5 medium. On day 3 (D3), recombinant NAMPT protein and/or INSR inhibitor were added. Samples were collected on day 8 (D8).
9. Top: H&E-stained images of skin organoids treated with M5 medium (control), N-RP, or N-RP-iINSR. Bottom: Representative immunofluorescence images for PCNA (marking proliferating cells) across treatment conditions; white dashed lines indicate the dermal–epidermal junction. n = 3 biologically independent samples.

**Extended Data Fig. 5**

**
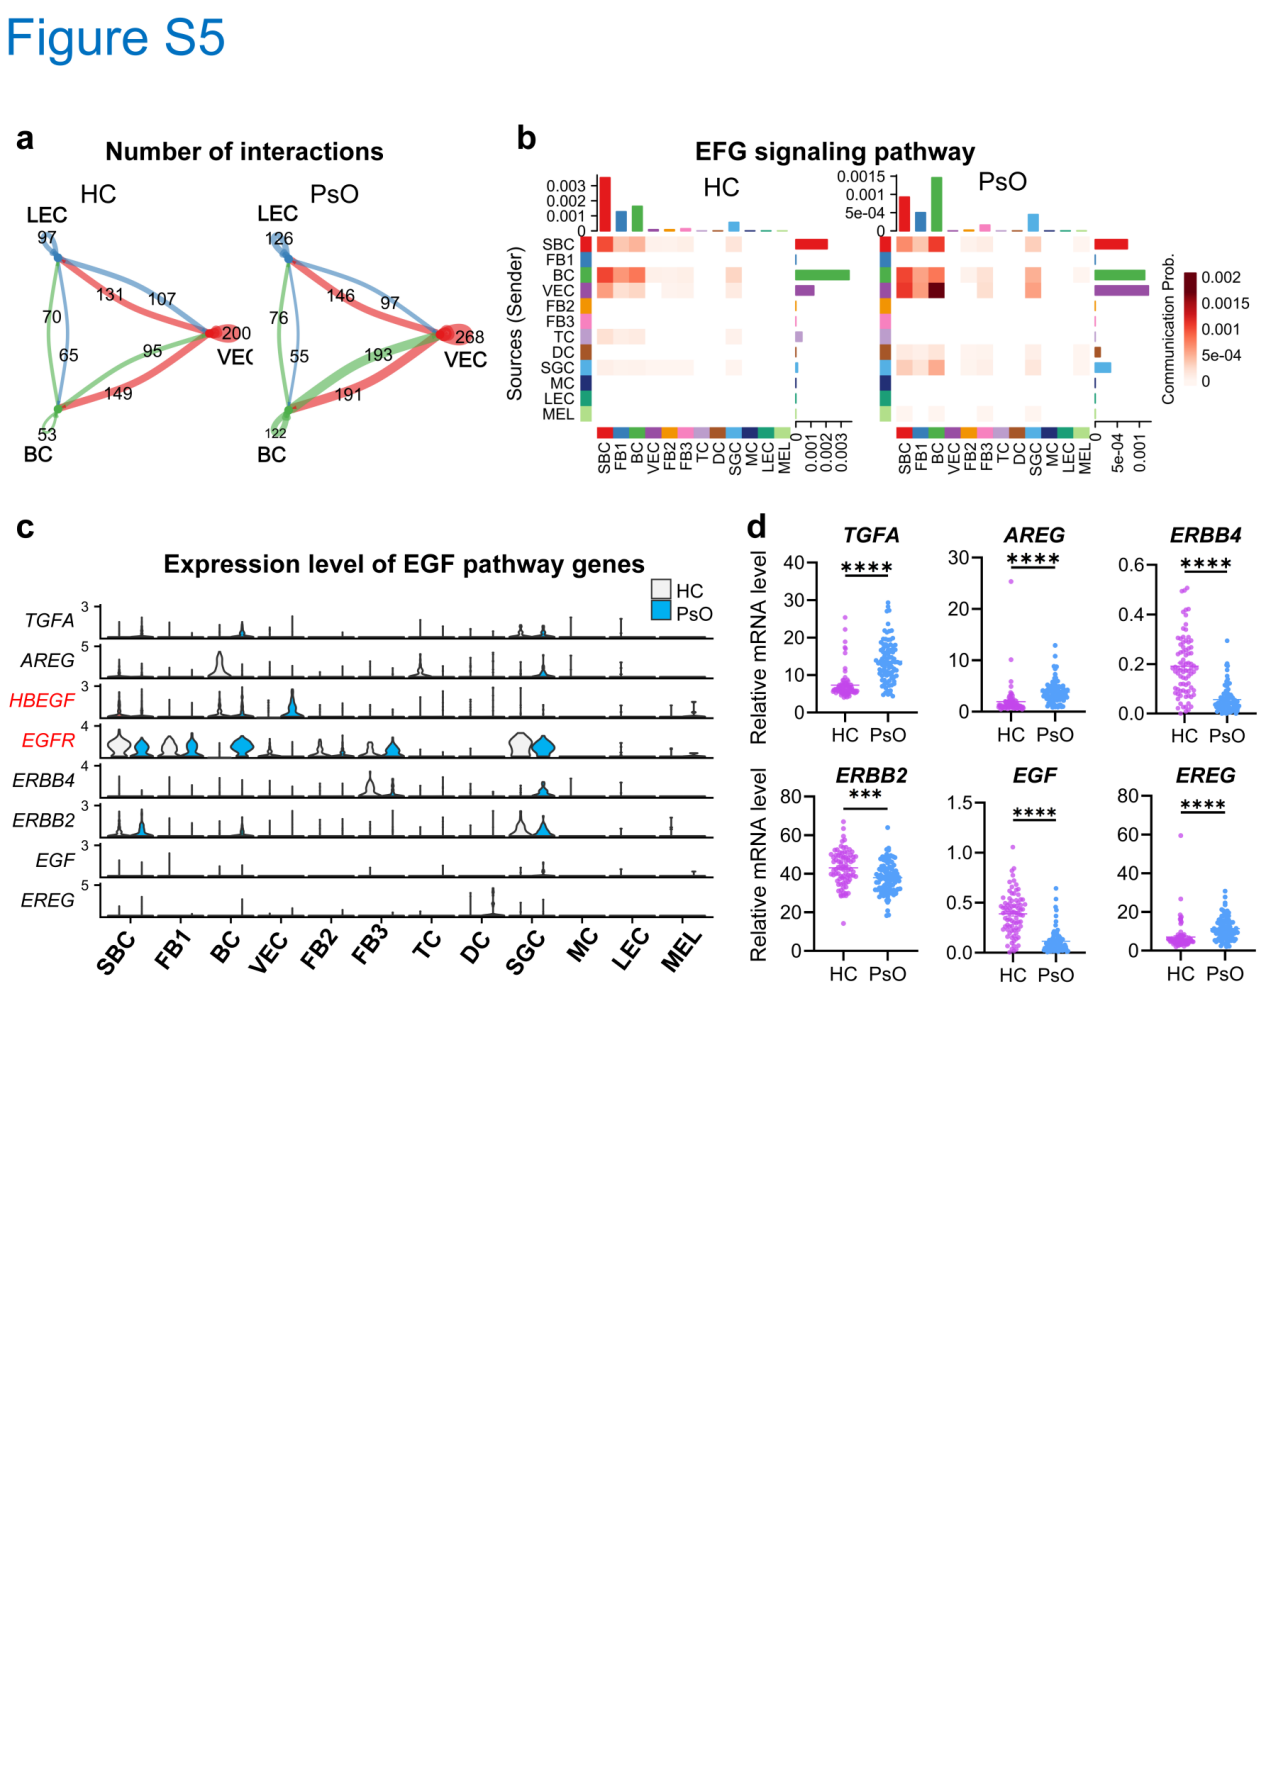
**

**Extended Data Fig. 5. The HBEGF-INSR axis-mediated crosstalk between vascular endothelial cells and basal cells is enhanced in psoriatic conditions.**

1. Circle plot showing the comparison of the number of intercellular interactions among lymphatic endothelial cells (LEC), VEC and BC between psoriatic and healthy groups.
2. Heatmap displaying the strength of intercellular interactions of the EGF signaling pathway across different cell populations between healthy control (HC) and psoriasis (PsO) groups.
3. Stacked violin plots showing the expression of EGF pathway-related genes in HC and PsO groups.
4. Bulk RNA-seq analysis showing the expression of EGF pathway genes in healthy and psoriatic skin samples; n > 3 biologically independent samples, ***p < 0.001, ****p<0.0001.

**Extended Data Fig. 6**

**
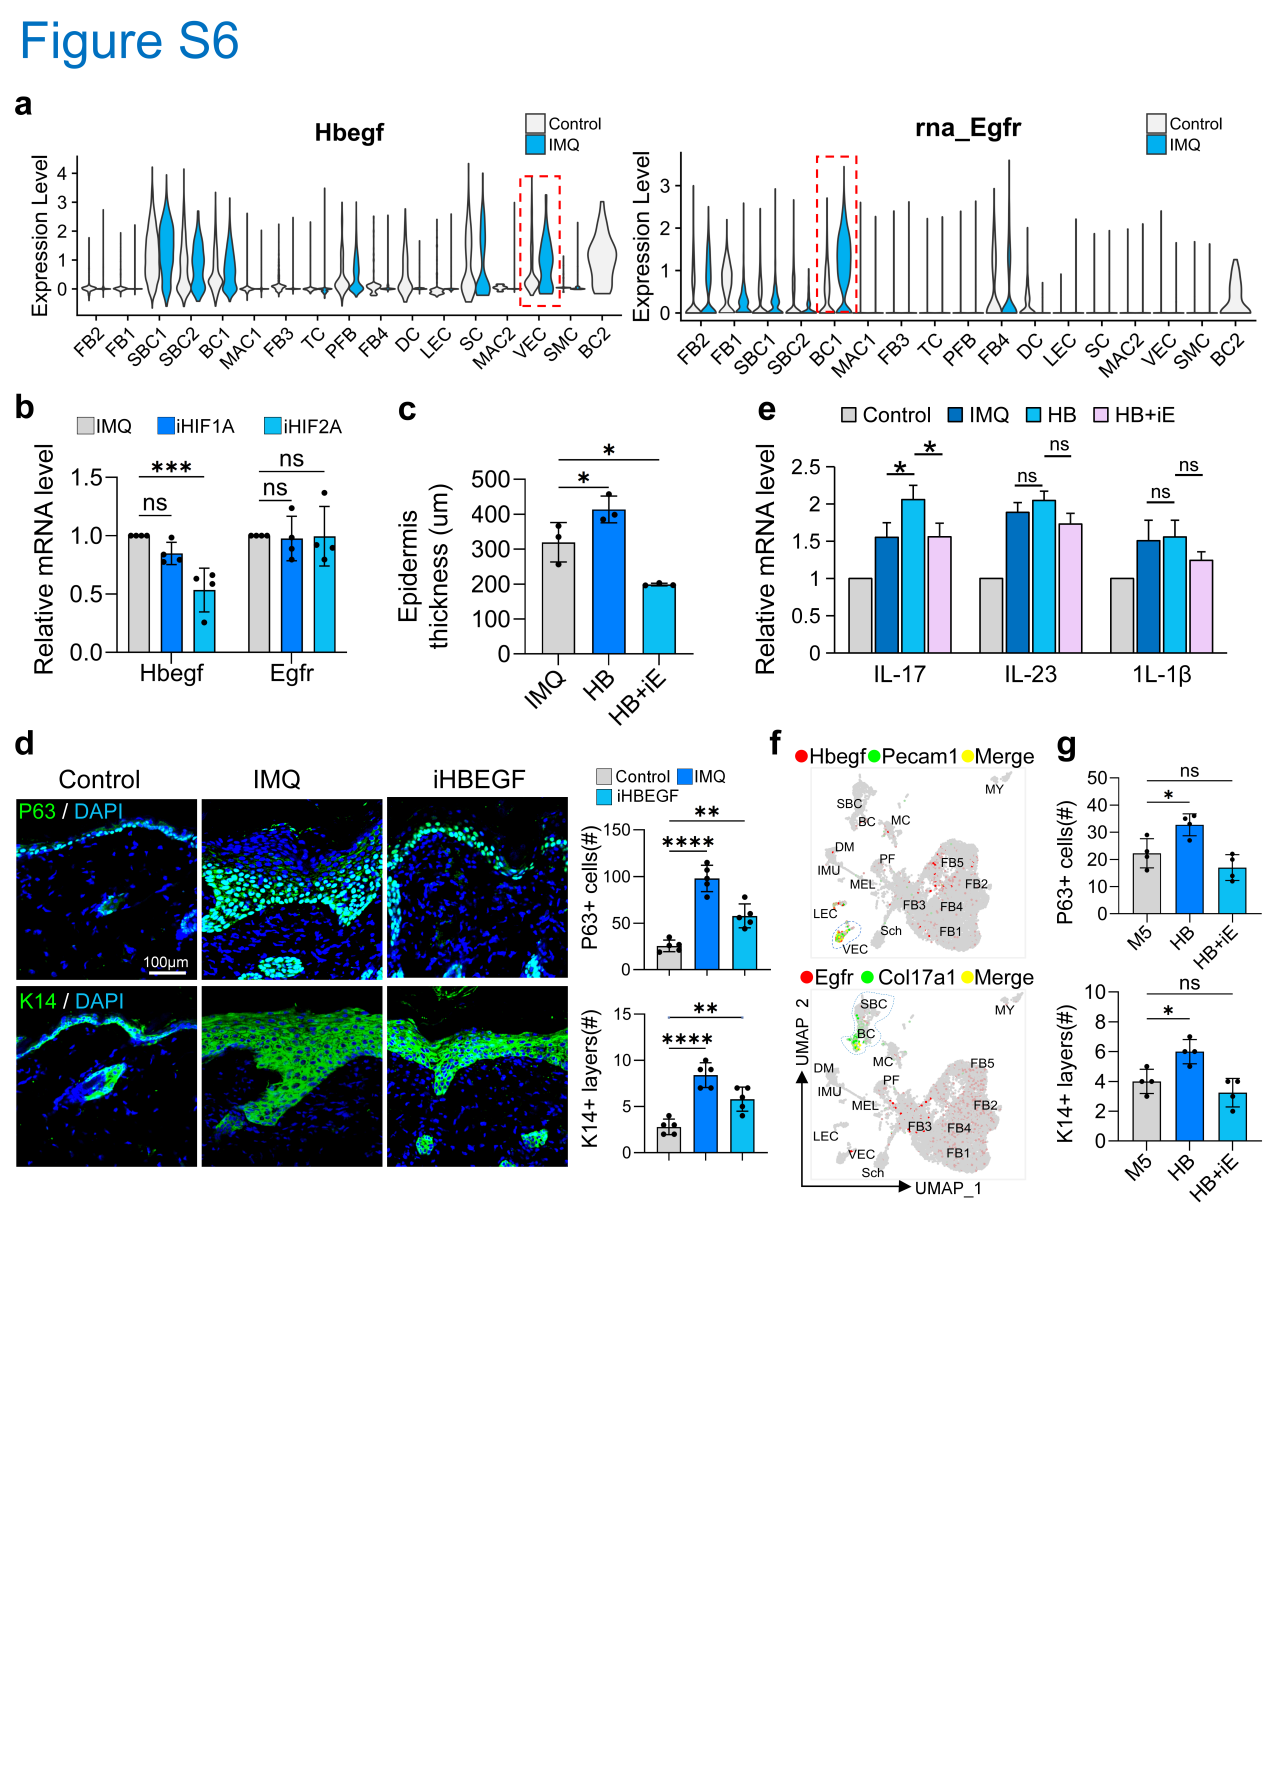
**

**Extended Data Fig. 6. Inhibition of the HBEGF–INSR axis impairs epidermal cell proliferation in a psoriatic skin organoid model.**

1. Violin plots showing the expression of Hbegf and Egfr across various cell populations in skin from control mice and imiquimod treated mice.
2. RT-qPCR quantification of Hbegf and Egfr expression following inhibition of HIF1A or HIF2A; n = 4 biologically independent samples. *p < 0.05; ns, not significant.
3. Quantification of dorsal skin thickness in control, IMQ-treated, and HBEGF recombinant protein with EGFR inhibition (HB+iE) groups; n = 3 biologically independent samples, ***p < 0.001.
4. Co-immunostaining of K14 and P63 in mouse dorsal skin. Representative images show the epidermal morphology in control, IMQ-treated, and anti-HBEGF neutralizing antibody-treated (iHBEGF) groups (left panel). Quantification of P63+ basal cell numbers and K14+ epidermal layers in the indicated groups (right panel). Data are presented as mean ± SD; n = 5, **p < 0.01, ****p < 0.0001 by one-way ANOVA.
5. Transcript levels of psoriasis-related cytokines in skin. mRNA expression of Il17a, Il23, and Il1b was assessed by RT-qPCR in skin samples from control, IMQ-treated, HBEGF-treated (HB), and HBEGF + EGFR inhibitor-treated (HB+iE) groups. Data are presented as mean ± SD; n = 3 , *p < 0.05; ns, not significant by one-way ANOVA.
6. Analysis of Hbegf and Egfr co-expression patterns from scRNA-seq of mouse skin organoids. Expression of Hbegf and Egfr was examined in relation to the endothelial marker Pecam1 and the basal keratinocyte marker Col17a1. Cell populations are annotated as follows: SBC, suprabasal cell; BC, basal cell; DM, dermal macrophage; IMU, immune cell; LEC, lymphatic endothelial cell; VEC, vascular endothelial cell; Sch, Schwann cell; MC, mast cell; FB, fibroblast; PF, proliferating fibroblast; MEL, melanocyte; MYF, myofibroblast.
7. Quantification of P63+ basal cell numbers and K14+ epidermal layer thickness in the M5, HB, HB+iE skin organoid groups. Data are presented as mean ± SD; n = 4, **p < 0.05, ns, not significant.

**Extended Data Fig. 7**

**
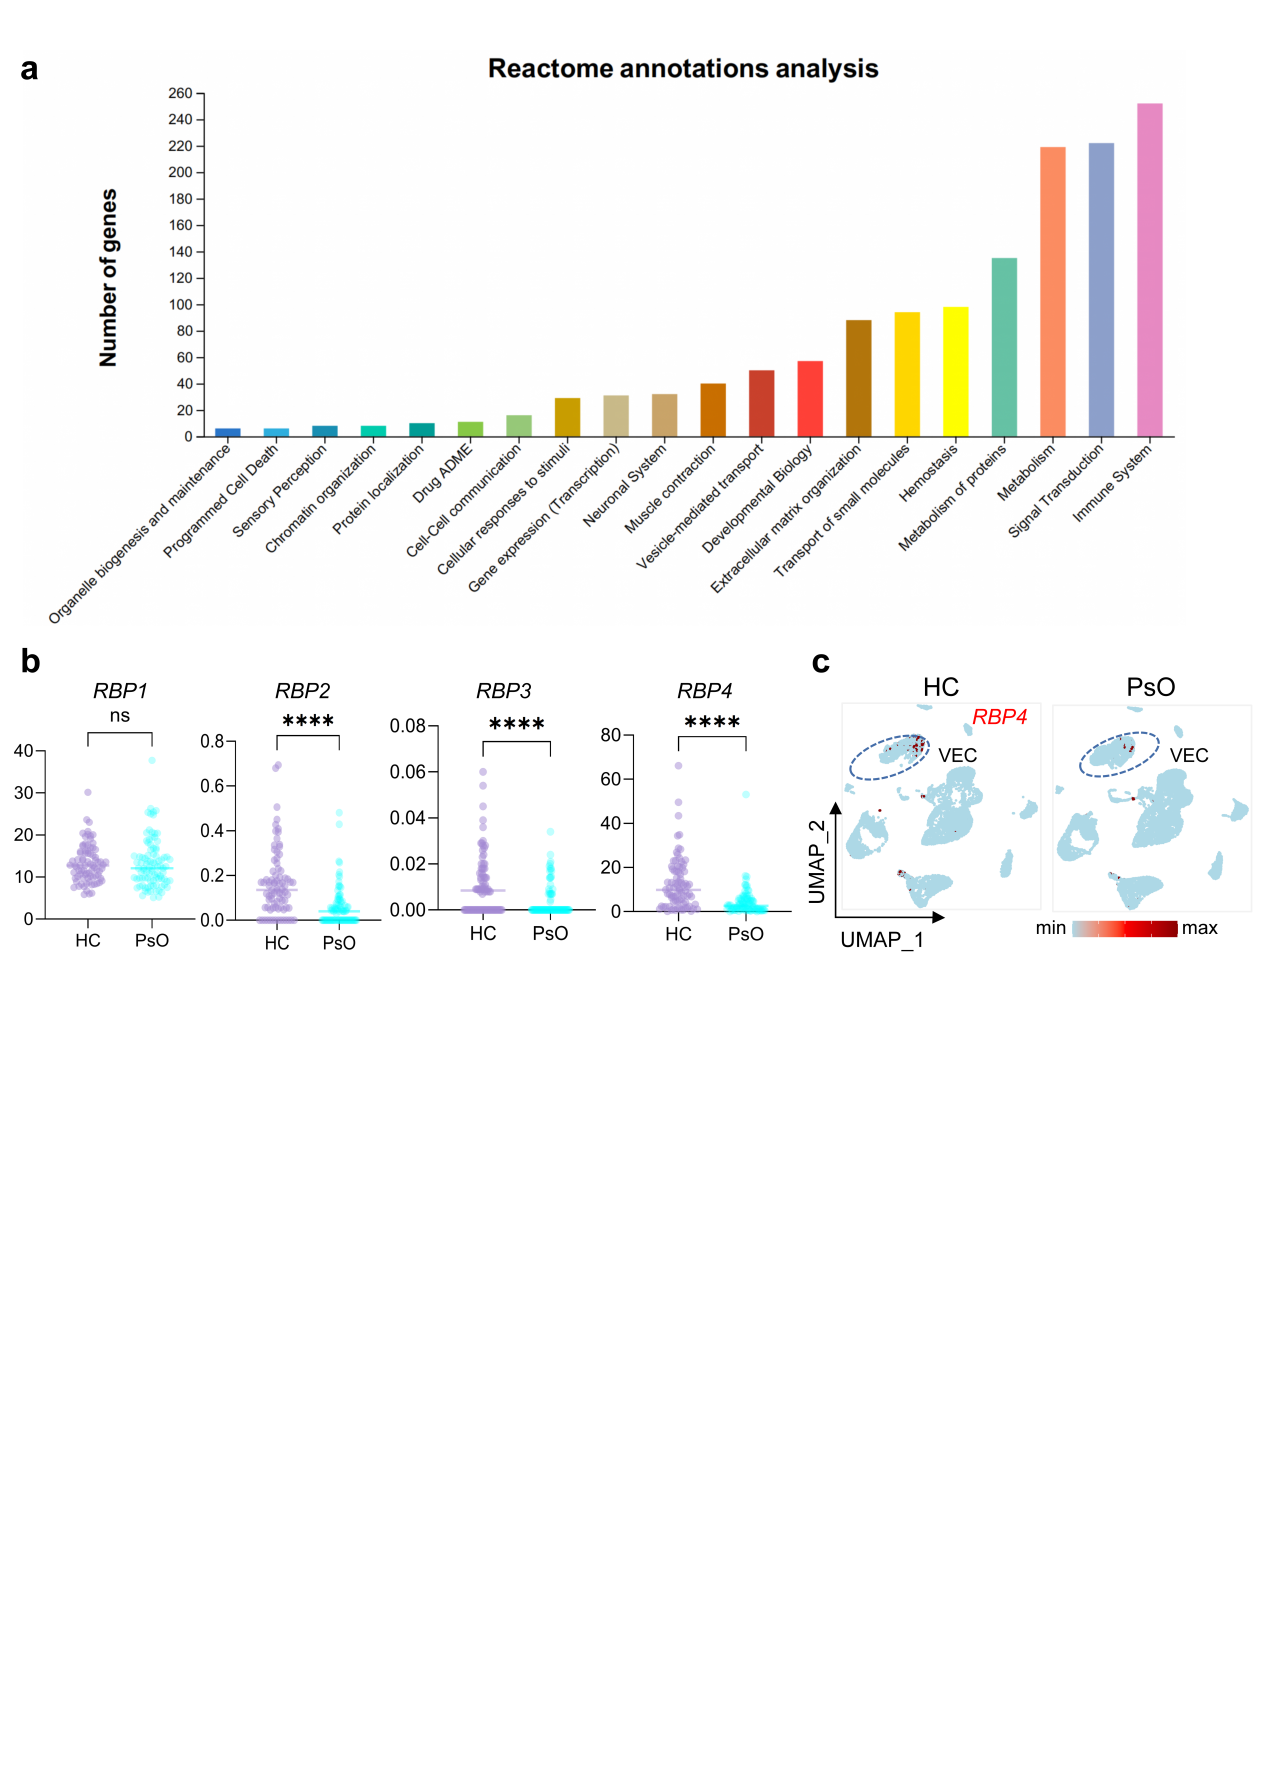
**

**Extended Data Fig. 7. EPAS1 activation inhibits retinol metabolism in mouse dorsal skin by suppressing the expression of retinol-binding protein 4.**

1. Bar chart showing Reactome enrichment analysis terms of upregulated genes in EPAS1 conditional knockout (EPAS1-cKO) mice and wild-type mice following imiquimod (IMQ) treatment.
2. Expression changes of retinol-binding proteins (RBP1, RBP2, RBP3, RBP4) between healthy control and psoriasis groups; n > 3 biologically independent samples, ns, not significant; ****p < 0.0001 (note: original "****p<0.05" corrected for consistency with standard statistical notation, as **** typically corresponds to p < 0.0001).
3. Feature plots showing the expression changes of RBP4 between healthy control (HC) and psoriasis (PsO) groups; n = 3 biologically independent samples per group.

**Extended Data Table**

**Extended Data Table 1:** The information of chemicals and recombinant proteins

|  | Company | Cat # |
| --- | --- | --- |
| Anhydrous ethanol | LMAI Bio | Cat # LM64-17-5 |
| DMEM/F12 | Corning | Cat # 10092018 |
| EGFR-IN-22 (EGFR inhibitor) | MedChemExpress | Cat # [2634646-14-1](https://www.medchemexpress.cn/cas/2634646-14-1.html) |
| U3-1565 (HBEGF inhibitor) | TargrtMol | Cat # T77438 |
| HBEGF mouse protein | MedChemExpress | Cat # HY-P7194 |
| IL-17A Protein | TargrtMol | Cat # TMPJ-01444 |
| IL-1A Protein | TargrtMol | Cat # TMPK-00920 |
| IL-22 Protein | TargrtMol | Cat # TMPJ-00061 |
| INSR inhibitor | MedChemExpress | Cat # HY-15656 |
| NAMPT mouse protein | MedChemExpress | Cat # HY-P701315 |
| Oncostatin M | MedChemExpress | Cat # HY-P7275 |
| Paraformaldehyde (PFA) | Servicebio | Cat # G1101 |
| PBS | Solarbio | Cat # [P1010](https://www.solarbio.com/goods-433.html" \t "https://www.solarbio.com/_blank) |
| RIPA | Beyotime | Cat # P0013B |
| TNF-α mouse protein | MedChemExpress | Cat # [HY-P79165A](https://www.medchemexpress.cn/recombinant-proteins/tnf-alpha-tnfsf2-protein-guinea-n-his.html) |
| Trypsin | Gibco | Cat # R001100 |
| VEGFR activator | MedChemExpress | Cat # 7646-79-9 |
| VEGFR inhibitor | MedChemExpress | Cat # HY-P9906 |
| Xylene | Chembk | Cat # 128686-03-3 |

**Extended Data Table 2:** The antibody information used in immunostaining

| Antibody | Company | Cat number |
| --- | --- | --- |
| DAPI | Beyotime | Cat # C1005 |
| E-cadherin | Beyotime | Cat # AF0138 |
| CD31 (PECAM1) | ThermoFisher | Cat # 5175-MSM30-P1 |
| NAMPT | ThermoFisher | Cat # PA1-1045 |
| INSR | Beyotime | Cat # AF7287 |
| FLT4 | Beyotime | Cat # AF6918 |
| HIF-1A | Cayman | Cat # 10006421 |
| HIF-2A (EPAS1) | Abcam | Cat # BL-95-1A2 |
| Col XVII | Beyotime | Cat # AF1078 |
| KRT14 | Boster | Cat # A01432 |
| HBEGF | Beyotime | Cat # AF7062 |
| EGFR | Beyotime | Cat # AF1330 |
| P63 | GeneTex | Cat # GTX102425 |
| PCNA | Beyotime | Cat # 13-3900 |
| RBP4 | Proteintech | Cat # 11774-1-AP |
| SPP1 | Beyotime | Cat # AF1651 |
| BrdU | Proteintech | Cat # 66241-1-Ig |
| CD45 | ThermoFisher | Cat # 11-0451-82 |
| IL17 | ThermoFisher | Cat # 740021M |

**Extended Data Table 3:** The information of primer for RT-qPCR

| Gene | Forward | Reverse |
| --- | --- | --- |
| HIF1A (human) | GAACGTCGAAAAGAAAAGTCTCG | CCTTATCAAGATGCGAACTCACA |
| EPAS1 (human) | CGGAGGTGTTCTATGAGCTGG | AGCTTGTGTGTTCGCAGGAA |
| NAMPT (human) | CGGCAGAAGCCGAGTTCAA | GCTTGTGTTGGGTGGATATTGTT |
| INSR (human) | AAAACGAGGCCCGAAGATTTC | GAGCCCATAGACCCGGAAG |
| Vegfa (mouse) | CTGCCGTCCGATTGAGACC | CCCCTCCTTGTACCACTGTC |
| Angptl2 (mouse) | AGCCTGAGAATACCAACCGC | CCCTTGCTTATAGGTCTCCCAG |
| IL-1b (mouse) | GCAACTGTTCCTGAACTCAACT | ATCTTTTGGGGTCCGTCAACT |
| IL-17a (mouse) | TTTAACTCCCTTGGCGCAAAA | CTTTCCCTCCGCATTGACAC |
| Nampt (mouse) | GCAGAAGCCGAGTTCAACATC | TTTTCACGGCATTCAAAGTAGGA |
| Insr (mouse) | ATGGGCTTCGGGAGAGGAT | GGATGTCCATACCAGGGCAC |
| HBEGF (human) | ATCGTGGGGCTTCTCATGTTT | TTAGTCATGCCCAACTTCACTTT |
| EGFR (human) | AGGCACGAGTAACAAGCTCAC | ATGAGGACATAACCAGCCACC |
| Hbegf (mouse) | CGGGGAGTGCAGATACCTG | TTCTCCACTGGTAGAGTCAGC |
| Egfr (mouse) | GCCATCTGGGCCAAAGATACC | GTCTTCGCATGAATAGGCCAAT |
| IL-23a (mouse) | ATGCTGGATTGCAGAGCAGTA | ACGGGGCACATTATTTTTAGTCT |
